# Supplementary material
Source: Springer Nature journal article supplement (https://www.springermedizin.de/resource/supplementary/12913_2013_3381_MOESM1_ESM.pdf/9532636)
Supplement: MOESM1 [file 9532636]

**Supplementary Material 1:** Comparison of variables that entered the propensity score as explanatory variables within the logistic regression model

|                                              | 2006 | 2007 | 2008 |
|----------------------------------------------|------|------|------|
| Age                                          | x    | x    | x    |
| Age*age                                      | x    | x    | x    |
| Age*age*age                                  | x    | x    | x    |
| Gender                                       | x    | x    | x    |
| Nationality                                  | x    | x    | x    |
| Postcode                                     | x    | x    | x    |
| Kind of insurance                            |      | x    | x    |
| Reduced earning capacity                     | x    | x    | x    |
| Cost of medication                           |      | x    | x    |
| Cost of physician                            | x    | x    | x    |
| Sickness benefit                             |      | x    |      |
| Cost of inpatient treatment                  | x    | x    | x    |
| Costs for alternative medicine               | x    | x    | x    |
| Cost of dentist                              | x    |      | x    |
| Further costs                                |      | x    | x    |
| Number of visits to physician                |      | x    | x    |
| Hypertension                                 |      |      | x    |
| Leukaemia                                    | x    |      |      |
| Paresis                                      |      | x    |      |
| Obesity                                      |      | x    |      |
| Angiopathy                                   | x    |      |      |
| Substance abuse                              | x    | x    | x    |
| Infection by opportunistic pathogens         |      | x    |      |
| Multiple myeloma/acute lymphocytic leukaemia |      |      | x    |

Selected variables for building the propensity score by logistic regression (continued)

|                                                                                           | 2006 | 2007 | 2008 |
|-------------------------------------------------------------------------------------------|------|------|------|
| Pulmonary metastasis/metastasis of digestive organ                                        |      | x    | x    |
| Metastasis/Kaposi's sarcoma                                                               |      | x    |      |
| Metastasis in lymph node                                                                  |      | x    | x    |
| Other severe malignant neoplasms                                                          |      | x    |      |
| Other malignant neoplasms                                                                 |      |      | x    |
| Other neoplasms                                                                           |      | x    | x    |
| Diabetes with renal manifestation                                                         |      | x    | x    |
| Diabetes without or with unspecified complications                                        | x    | x    |      |
| Very serious metabolic disorder                                                           |      |      | x    |
| Other severe endocrine or metabolic disorder                                              | x    | x    |      |
| Terminal liver disease                                                                    |      | x    |      |
| Liver cirrhosis                                                                           |      | x    | x    |
| Chronic hepatitis                                                                         |      | x    |      |
| Chronic inflammatory bowel disease                                                        | x    | x    |      |
| Oesophagitis, reflux and other diseases of the oesophagus (without<br>ulcus and bleeding) |      | x    | x    |
| Inflammation/necrosis of bones/joints/muscles                                             |      | x    |      |
| Rheumatoid arthritis and inflammatory connective tissue diseases                          | x    | x    | x    |
| Spinal stenosis                                                                           | x    | x    | x    |
| Not postmenopausal osteoporosis                                                           | x    |      |      |
| Myelodysplastic syndrome and other severe haematological<br>diseases                      |      |      | x    |
| Agranulocytosis and other immune system disorders                                         |      | x    |      |
| Other coagulopathy                                                                        |      |      | x    |
| Delirium and encephalopathy                                                               |      | x    |      |
| Dementia                                                                                  |      |      | x    |

Selected variables for building the propensity score by logistic regression (continued)

|                                                                                   | 2006 | 2007 | 2008 |
|-----------------------------------------------------------------------------------|------|------|------|
| Schizophrenia                                                                     |      |      | x    |
| Psychosis, psychotic and dissociative disorder                                    |      | x    |      |
| Depression and delusional disorders                                               |      | x    |      |
| Muscular dystrophy                                                                |      | x    |      |
| Polyneuropathy                                                                    | x    | x    |      |
| Multiple sclerosis                                                                | x    |      |      |
| Parkinson's disease and Huntington's disease                                      |      | x    |      |
| Acute pulmonary oedema and respiratory failure                                    |      | x    |      |
| Heart failure                                                                     |      | x    |      |
| Acute myocardial infarction                                                       | x    | x    | x    |
| Unstable angina and other acute ischaemic heart disease                           | x    |      | x    |
| Angina, status post myocardial infarction                                         | x    | x    | x    |
| Coronary heart disease/other chronic heart disease                                | x    | x    | x    |
| Acquired diseases of the heart valves and rheumatic heart disease                 | x    | x    | x    |
| Severe congenital heart defects                                                   |      |      | x    |
| Hypertensive heart and renal disease                                              |      | x    |      |
| Hypertensive heart disease                                                        |      | x    |      |
| Hypertension                                                                      |      | x    |      |
| Defined arrhythmias                                                               |      | x    |      |
| Hemiplegia/hemiparesis                                                            |      |      | x    |
| Not defined late effects of cerebrovascular disease                               |      | x    |      |
| Atherosclerosis                                                                   |      | x    | x    |
| Status asthmaticus (age>17), postinflammatory pulmonary fibrosis                  |      | x    |      |
| Chronic obstructive bronchitis/emphysema (age>17), status<br>asthmaticus (age<18) | x    | x    | x    |
| Other pneumonia, emphysema, lung abscess, pleuritis                               |      | x    |      |

Selected variables for building the propensity score by logistic regression (continued)

|                                                       | 2006 | 2007 | 2008 |
|-------------------------------------------------------|------|------|------|
| Dialysis status                                       | x    | x    | x    |
| Kidney failure                                        |      |      | x    |
| Nephritis                                             |      | x    | x    |
| Skin ulcer (without pressure sores)                   |      | x    |      |
| Pathological fracture of the humerus, tibia or fibula |      | x    |      |
| Other iatrogenic complications                        | x    | x    | x    |
| Transplantation of a major organ, receiver status     |      |      | x    |
